# Supplementary material for: Possible Effects of Early Maternal Separation on the Gut Microbiota of Captive Adult Giant Pandas
Source: MDPI journal article supplement (doi:10.3390/ani12192587), 2022-09-27
Supplement: s1 [file s1]

**Table S1:** Species Alpha Diversity Index

| SampleID | simpson        | chao1     | shannon  |
|----------|----------------|-----------|----------|
| O_PR_1   | 0.942619190644 | 3580.4114 | 5.778934 |
| O_PR_2   | 0.982701713232 | 5024.2211 | 7.643845 |
| O_PR_3   | 0.957919053548 | 4489.5543 | 6.431899 |
| O_PR_4   | 0.974593491751 | 5772.4558 | 7.524415 |
| O_PR_5   | 0.974780941474 | 5649.6124 | 7.315401 |
| O_PR_6   | 0.959603204284 | 3585.5707 | 6.329429 |
| O_HR_1   | 0.970625221293 | 5184.1634 | 7.219651 |
| O_HR_2   | 0.964970440085 | 5186.1696 | 6.652565 |
| O_HR_3   | 0.981144309061 | 5189.6968 | 7.626753 |
| O_HR_4   | 0.98043864264  | 6169.1596 | 7.626226 |
| O_HR_5   | 0.97889342516  | 6530.0134 | 7.554209 |
| O_HR_6   | 0.98074416722  | 6753.0580 | 7.356411 |

**Table S2.**  $\alpha$  diversity index of gut microbes in captive giant pandas adopting different nursing methods.

| $\alpha$ diversity index | <i>p</i> -value |
|--------------------------|-----------------|
| Simpson index            | 0.589           |
| Shannon index            | 0.589           |
| Chao1 index              | 0.810           |
